# Supplementary material
Source: PubMed Central journal article supplement (PMC6974642)
Supplement: zam003209586s1.pdf [file zam003209586s1.pdf]

1.

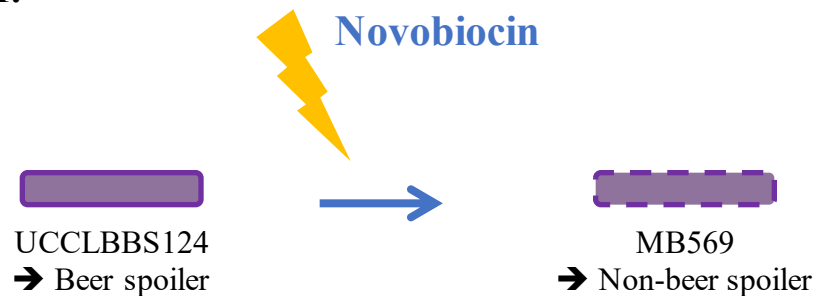

2.

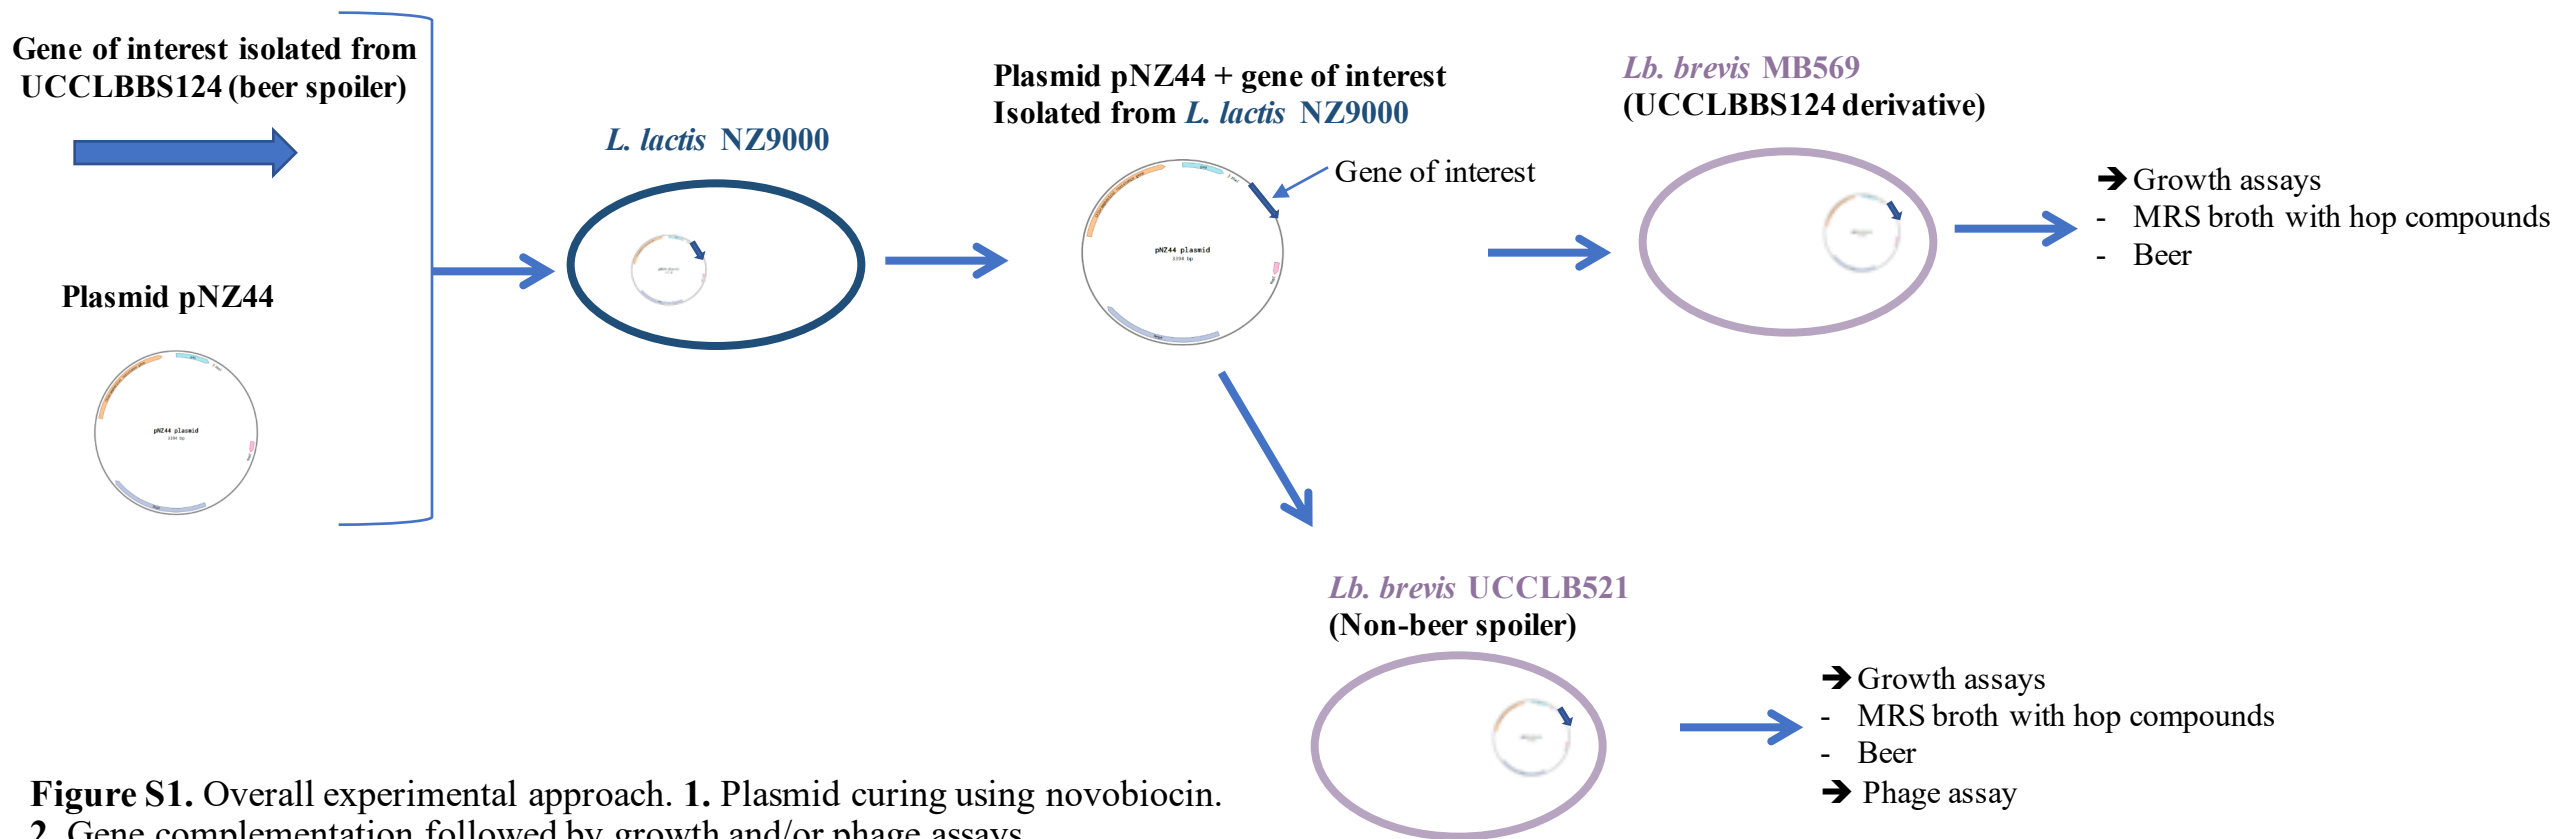

**Figure S1.** Overall experimental approach. **1.** Plasmid curing using novobiocin. **2.** Gene complementation followed by growth and/or phage assays.
